# Supplementary material for: Graphitic GaN–ZnO and corresponding nanotubes
Source: Royal Society of Chemistry journal article supplement (doi:10.1039/c1jm13212a), 2011-01-01
Supplement: c1jm13212a.pdf [file c1jm13212a.pdf]

# Graphitic GaN-ZnO and corresponding nanotubes

Guo-Liang Chai <sup>a,b</sup>, Chen-Sheng Lin <sup>a</sup> and Wen-Dan Cheng<sup>\*a</sup>

<sup>a</sup> State Key Laboratory of Structural Chemistry, Fujian Institute of Research on the Structure of Matter, Chinese Academy of Sciences, Fuzhou, Fujian 350002, China

<sup>b</sup> Graduate School of the Chinese Academy of Sciences, Beijing, 100039, P. R. China

\*E-mail: [cwd@fjirsm.ac.cn](mailto:cwd@fjirsm.ac.cn)

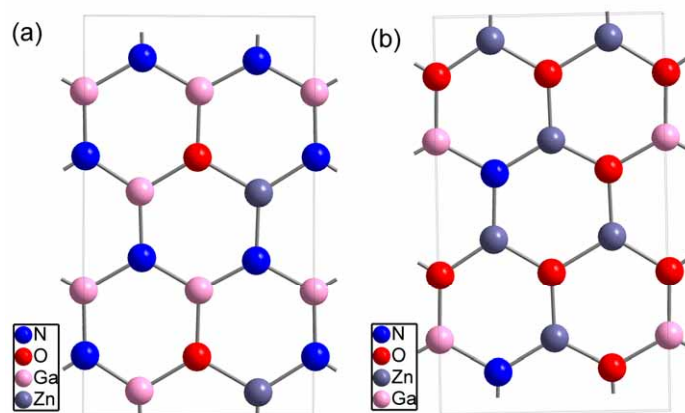

**Figure S1:** The most stable configurations of GaN-ZnO nanosheets with ZnO concentrations of (a) 25% and (b) 75%.

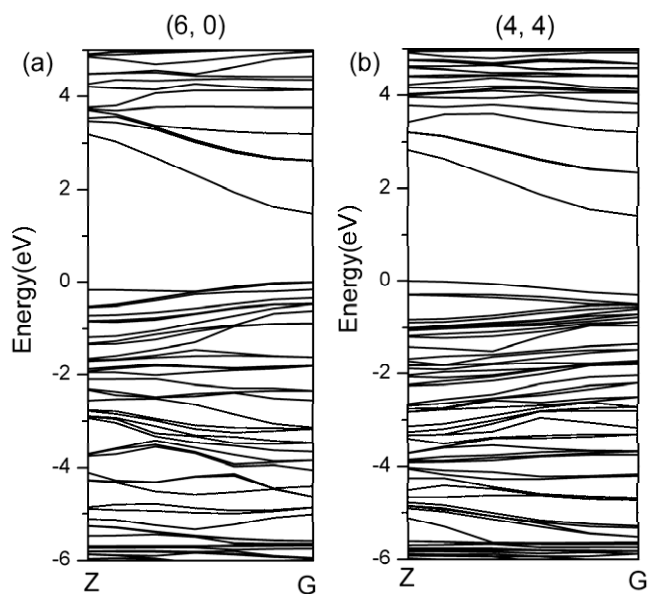

**Figure S2:** Band structures of (a) (6, 0) and (b) (4, 4) GaN-ZnO nanotubes with ZnO concentrations of 25%.

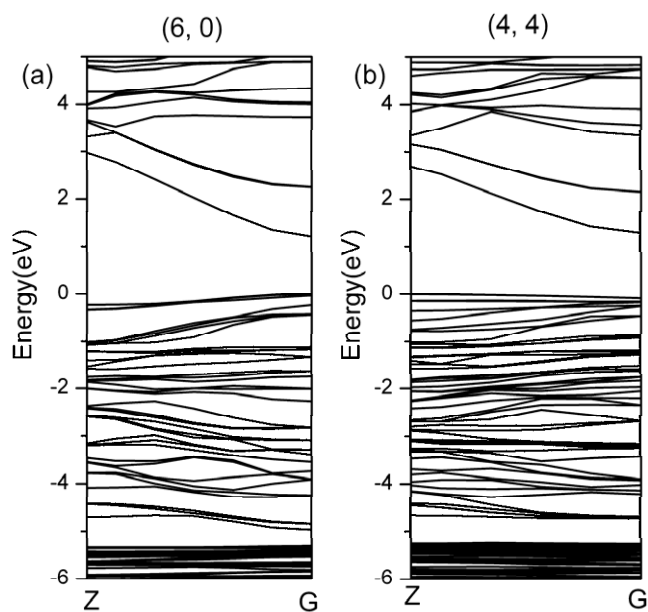

**Figure S3:** Band structures of (a) (6, 0) and (b) (4, 4) GaN-ZnO nanotubes with ZnO concentrations of 75%.

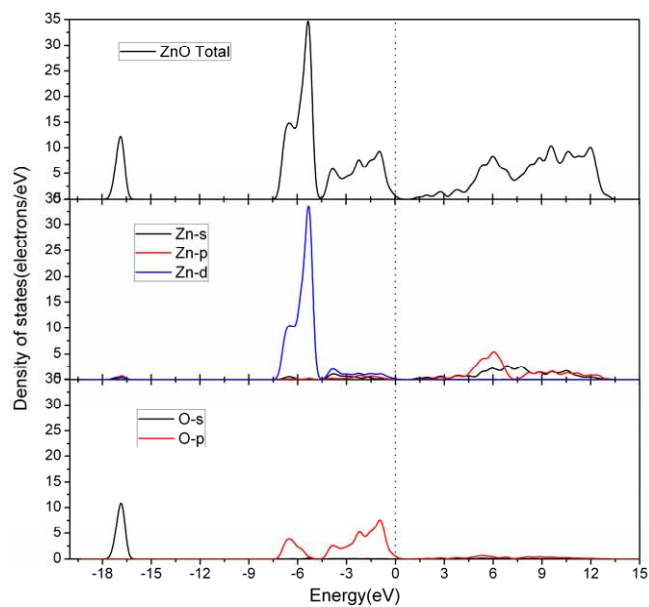

**Figure S4:** The total and partial density of states of pure ZnO nanosheet.

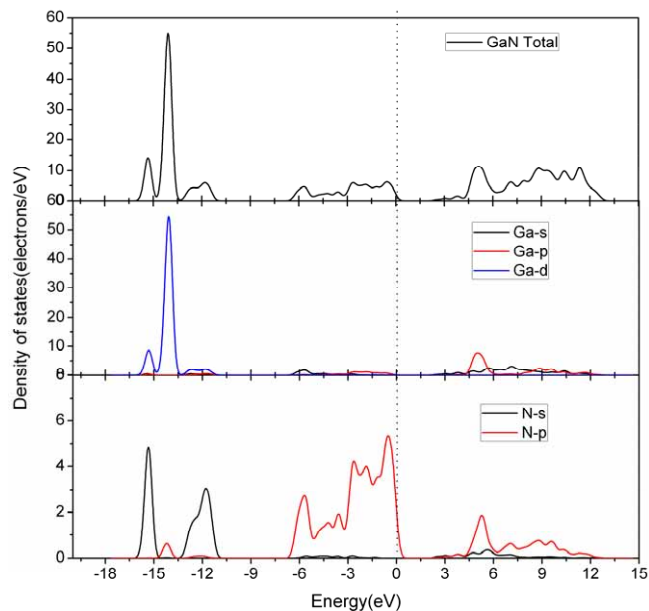

**Figure S5:** The total and partial density of states of pure GaN nanosheet.

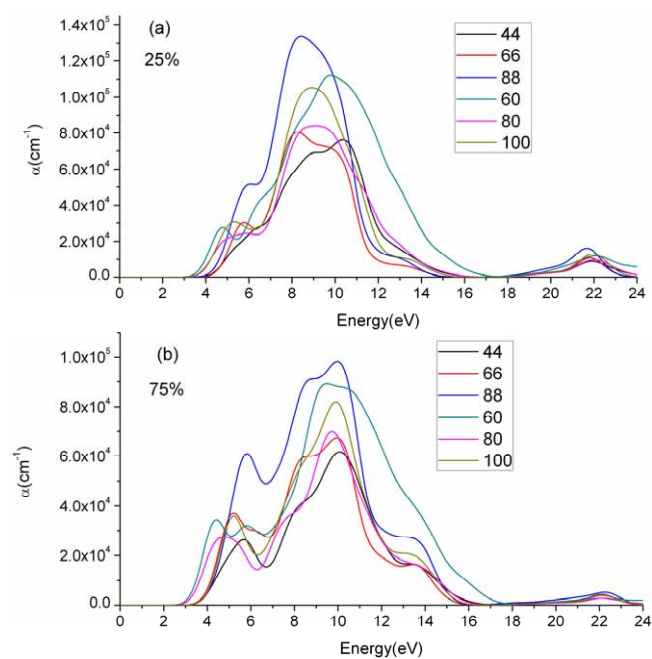

**Figure S6:** The absorption spectra of the GaN-ZnO nanotubes with ZnO concentrations of (a) 25% and (b) 75%.
